# Supplementary material for: Amaranthus cruentus L. Seed Oil Counteracts UVA-Radiation-Induced Inhibition of Collagen Biosynthesis and Wound Healing in Human Skin Fibroblasts
Source: MDPI journal article supplement (doi:10.3390/ijms25020925), 2024-01-11

**Table S1** Collagen biosynthesis measurements in fibroblasts irradiated with UVA and treated with AmO at concentrations of 0.05%, 0.1% and 0.15%. (1<sup>st</sup> - first measurement in sample. 2<sup>nd</sup> - second measurement in sample.  $\Delta$  - difference between 1st and 2nd measurement in sample. \*statistically significant differences at  $p < 0.05$  compared to the control. \*\*statistically significant difference at  $p < 0.05$  compared to UVA. SD – standard deviation. SEM – standard error).

| Sample          | 1st  | 2nd  | $\Delta^1$ | 1st  | 2nd  | $\Delta^2$ | 1st  | 2nd  | $\Delta^3$ | Mean value<br>( $\Delta^1 + \Delta^2 + \Delta^3$ )/3 | % per cent | SD     | SEM    |
|-----------------|------|------|------------|------|------|------------|------|------|------------|------------------------------------------------------|------------|--------|--------|
| Control         | 2486 | 1503 | 983        | 1849 | 1682 | 167        | 1866 | 1863 | 3          | 384.33                                               | 100        | 524.90 | 399.11 |
| 0.05% AmO       | 1611 | 1387 | 224        | 1542 | 1321 | 221        | 2031 | 1379 | 652        | 365.66                                               | 95.14      | 247.97 | 190.88 |
| 0.1% AmO        | 2296 | 1752 | 544        | 2115 | 1753 | 362        | 2069 | 1892 | 177        | 361                                                  | 93.93*     | 183.50 | 122.66 |
| 0.15%AmO        | 2286 | 1722 | 564        | 2015 | 1743 | 272        | 2079 | 1882 | 197        | 344.33                                               | 89.59      | 193.89 | 146.44 |
| UVA             | 914  | 616  | 298        | 846  | 681  | 165        | 685  | 517  | 198        | 220.33                                               | 57.32*     | 69.25  | 51.777 |
| 0.05% AmO + UVA | 1182 | 948  | 234        | 1156 | 1035 | 121        | 1400 | 862  | 538        | 297.66                                               | 77.45**    | 215.66 | 160.22 |
| 0.1% AmO + UVA  | 2286 | 1822 | 464        | 2115 | 1843 | 272        | 1979 | 1782 | 197        | 311                                                  | 80.91**    | 137.70 | 102    |
| 0.15%AmO + UVA  | 2186 | 1922 | 264        | 2005 | 1543 | 462        | 2129 | 1882 | 247        | 324.33                                               | 84.38**    | 119.52 | 91.777 |

**Table S2** Prolidase activity in fibroblasts irradiated with UVA and treated with AmO at concentrations of 0.05%, 0.1% and 0.15%. The mean values from the experiments performed in triplicates. \*statistically significant differences at  $p < 0.05$  compared with the control. \*\*statistically significant difference at  $p < 0.05$  compared to UVA.

| Sample             | Control | 0.05% AmO | 0.1% AmO | 0.15%AmO | UVA   | 0.05% AmO + UVA | 0.1% AmO + UVA | 0.15%AmO + UVA |
|--------------------|---------|-----------|----------|----------|-------|-----------------|----------------|----------------|
| Mean value         | 116.4   | 123.38    | 126.87   | 130.36   | 62.86 | 87.3            | 93.12          | 98.94          |
| % of control value | 100     | 106       | 109      | 112      | 54*   | 75**            | 80**           | 85**           |

**Figure S1** Western blot densitometry (plot measurement) results by gel analysis tool for ImageJ® 1.8.0 for  $\beta$ 1- integrin (A) and IGF-IR (B) receptors expression in UVA-irradiated fibroblasts in the presence of AmO at concentrations of 0.05%, 0.1%. and 0.15%.

(A)

| Sample                                | Plot measurement | % of control |
|---------------------------------------|------------------|--------------|
| <b>Control</b> <sup>(a)</sup>         | 7581.518         | 100          |
| <b>0.05% AmO</b> <sup>(b)</sup>       | 6555.539         | 86.46737     |
| <b>0.1% AmO</b> <sup>(c)</sup>        | 6438.468         | 84.9232      |
| <b>0.15%AmO</b> <sup>(d)</sup>        | 6348.63          | 83.73824     |
| <b>UVA</b> <sup>(e)</sup>             | 1439.355         | 18.98505     |
| <b>0.05% AmO + UVA</b> <sup>(f)</sup> | 1788.941         | 23.59608     |
| <b>0.1% AmO + UVA</b> <sup>(g)</sup>  | 3641.104         | 48.02605     |
| <b>0.15%AmO + UVA</b> <sup>(h)</sup>  | 3841.083         | 50.66377     |

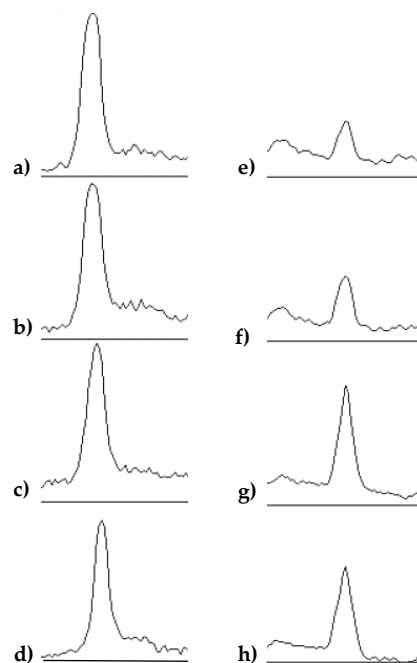

(B)

| Sample                                | Plot measurement | % of control |
|---------------------------------------|------------------|--------------|
| <b>Control</b> <sup>(a)</sup>         | 12890.782        | 100          |
| <b>0.05% AmO</b> <sup>(b)</sup>       | 11842.539        | 91.86827     |
| <b>0.1% AmO</b> <sup>(c)</sup>        | 11883.075        | 92.18273     |
| <b>0.15%AmO</b> <sup>(d)</sup>        | 12334.953        | 95.68817     |
| <b>UVA</b> <sup>(e)</sup>             | 3148.154         | 24.42175     |
| <b>0.05% AmO + UVA</b> <sup>(f)</sup> | 7389.397         | 57.32311     |
| <b>0.1% AmO + UVA</b> <sup>(g)</sup>  | 8502.589         | 65.95867     |
| <b>0.15%AmO + UVA</b> <sup>(h)</sup>  | 8557.125         | 66.38174     |

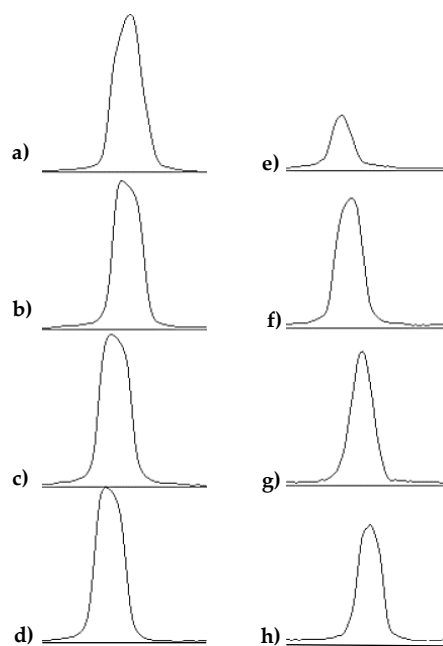

**Figure S2** Western blot densitometry (plot measurement) results by gel analysis tool for ImageJ® 1.8.0 for TGF- $\beta$ 1 (A) and p38 (B) protein expression in UVA-irradiated fibroblasts in the presence of AmO at concentrations of 0.05%, 0.1%, and 0.15%.

(A)

| Sample                         | Plot measurement | % of control |
|--------------------------------|------------------|--------------|
| Control <sup>(a)</sup>         | 4187.0           | 100          |
| 0.05% AmO <sup>(b)</sup>       | 5067.7           | 121          |
| 0.1% AmO <sup>(c)</sup>        | 5880.4           | 170          |
| 0.15%AmO <sup>(d)</sup>        | 6208.1           | 252          |
| UVA <sup>(e)</sup>             | 640.5            | 15           |
| 0.05% AmO + UVA <sup>(f)</sup> | 1068.4           | 26           |
| 0.1% AmO + UVA <sup>(g)</sup>  | 2060.9           | 49           |
| 0.15%AmO + UVA <sup>(h)</sup>  | 3273.3           | 78           |

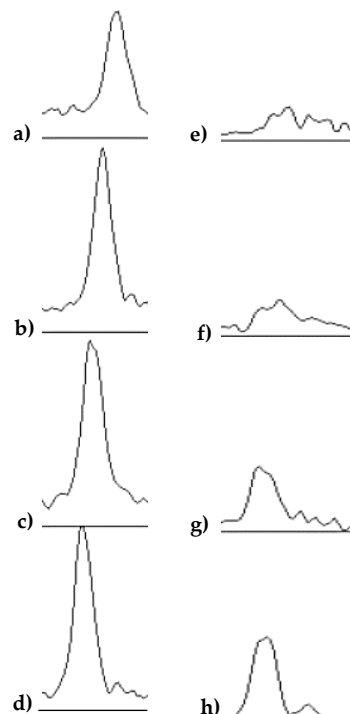

B)

| Sample                         | Plot measurement | % of control |
|--------------------------------|------------------|--------------|
| Control <sup>(a)</sup>         | 1473.941         | 100          |
| 0.05% AmO <sup>(b)</sup>       | 1520.719         | 103          |
| 0.1% AmO <sup>(c)</sup>        | 1497.548         | 102          |
| 0.15%AmO <sup>(d)</sup>        | 1823.406         | 124          |
| UVA <sup>(e)</sup>             | 4745.033         | 322          |
| 0.05% AmO + UVA <sup>(f)</sup> | 3081.426         | 209          |
| 0.1% AmO + UVA <sup>(g)</sup>  | 2911.205         | 198          |
| 0.15%AmO + UVA <sup>(h)</sup>  | 1548.184         | 105          |

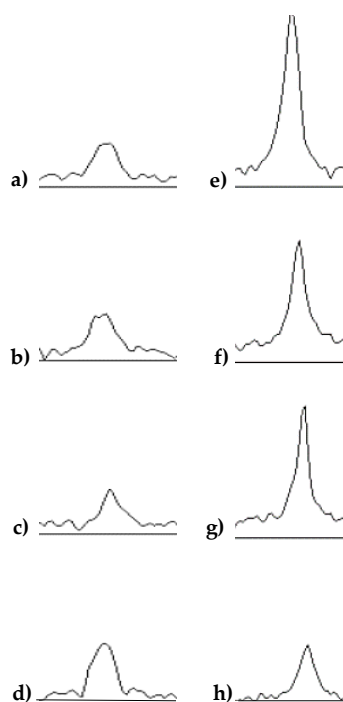

**Figure S3** Western blot densitometry (plot measurement) results by gel analysis tool for ImageJ® 1.8.0 for COX-2 protein expression in UVA-irradiated fibroblasts in the presence of AmO at concentrations of 0.05%, 0.1%, and 0.15%.

| Sample                                | Plot measurement | % of control |
|---------------------------------------|------------------|--------------|
| <b>Control</b> <sup>(a)</sup>         | 2926.255         | 100          |
| <b>0.05% AmO</b> <sup>(b)</sup>       | 3177.255         | 109          |
| <b>0.1% AmO</b> <sup>(c)</sup>        | 3385.983         | 116          |
| <b>0.15%AmO</b> <sup>(d)</sup>        | 3484.154         | 119          |
| <b>UVA</b> <sup>(e)</sup>             | 7350.811         | 251          |
| <b>0.05% AmO + UVA</b> <sup>(f)</sup> | 6140.983         | 210          |
| <b>0.1% AmO + UVA</b> <sup>(g)</sup>  | 5932.225         | 203          |
| <b>0.15%AmO + UVA</b> <sup>(h)</sup>  | 2874.418         | 98           |

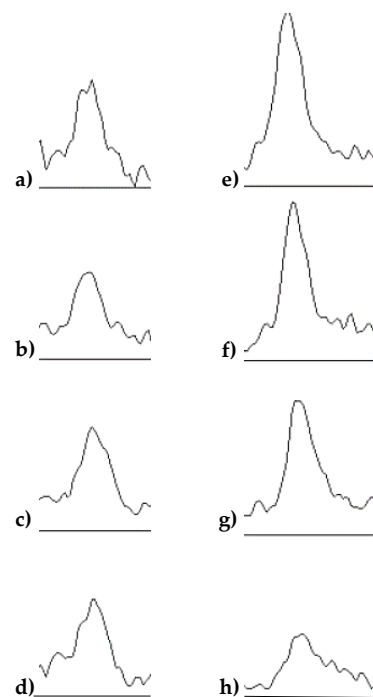

Supplement: s1 [file s1]
