# Supplementary material for: Amaranthus cruentus L. Seed Oil Counteracts UVA-Radiation-Induced Inhibition of Collagen Biosynthesis and Wound Healing in Human Skin Fibroblasts
Source: MDPI journal article supplement (doi:10.3390/ijms25020925), 2024-01-11
Supplement: s1 [file s1]

**File S1. Material Safety Data Sheet for tested oil from *Amaranthus cruentus* seed [source: Szarłat M. i W. Lenkiewicz Zawady Poland].**

| Product Specification             | Product Name:<br>Cosmetic Amaranth Oil                                                                                                                                               | Specification Number:<br>SP-10/OL |
|-----------------------------------|--------------------------------------------------------------------------------------------------------------------------------------------------------------------------------------|-----------------------------------|
| INCI Name:                        | <i>Amaranthus cruentus</i> seed oil                                                                                                                                                  |                                   |
| Product Description               | Unrefined oil obtained by cold-pressing the seeds of <i>Amaranthus cruentus</i> . Crystallization below 17°C is a natural phenomenon and does not affect the quality of the product. |                                   |
| Country of Origin                 | Poland                                                                                                                                                                               |                                   |
| Intended Use                      | For external use, for massage, as an additive to baths                                                                                                                               |                                   |
| Ingredients                       | 100% amaranthus seed oil                                                                                                                                                             |                                   |
| Physical and Chemical Properties: | Color                                                                                                                                                                                | Yellow to orange                  |
|                                   | Odor                                                                                                                                                                                 | Specific, without foreign odors   |
|                                   | Density (g/cm <sup>3</sup> )                                                                                                                                                         | 0.92                              |
|                                   | Water and Volatile Substances Content (% max)                                                                                                                                        | 0.5                               |
|                                   | Acid Value (mg KOH/g of oil) max                                                                                                                                                     | 5.0                               |
|                                   | Peroxide Value (mEq O/kg of oil) max                                                                                                                                                 | 10.0                              |
|                                   | Insoluble Impurities Content (% max)                                                                                                                                                 | 0.2                               |
|                                   | * Iodine value (g I <sub>2</sub> /100)                                                                                                                                               | 120-140                           |
| Harmful Metals                    | * Lead (mg/kg) max:                                                                                                                                                                  | 0.1                               |
| Fatty Acid Content (%)*           | Palmitic C16:0                                                                                                                                                                       | 15.0-21.2                         |
|                                   | Stearic C18:0                                                                                                                                                                        | 2.5-5.5                           |
|                                   | Oleic C18:1                                                                                                                                                                          | 15.5-22.5                         |
|                                   | Linoleic C18:2                                                                                                                                                                       | 42.0-65.0                         |
| Other:                            | Squalene Content (%)*                                                                                                                                                                | 4.0-8.0                           |
| Microbiological Requirements*     | Presence of <i>Escherichia coli</i> in 1g                                                                                                                                            | Absent                            |
|                                   | Presence of <i>Staphylococcus aureus</i> in 1g                                                                                                                                       | Absent                            |
|                                   | Presence of <i>Pseudomonas aeruginosa</i> in 1g                                                                                                                                      | Absent                            |
|                                   | Presence of <i>Candida albicans</i> in 1g                                                                                                                                            | Absent                            |
|                                   | Total Count of Mesophilic Aerobic Microorganisms CFU/g max:                                                                                                                          | 5x10 <sup>3</sup>                 |
| Allergens                         | Does not contain**                                                                                                                                                                   |                                   |
| GMO Information                   | Does not contain genetically modified ingredients                                                                                                                                    |                                   |
| Packaging                         | Allowed for contact with cosmetics, clean, undamaged, ensuring proper quality and durability of the product                                                                          |                                   |
| Labeling                          | Labeling of individual packaging in accordance with the current requirements contained in the Cosmetics Act of March 30, 2001 (Journal of Laws No. 42, item 473)                     |                                   |
| Storage Conditions                | Rooms should be dry, clean, free from foreign odors and pests; optimal temperature not exceeding 20°C; optimal humidity not exceeding 80%                                            |                                   |
| Shelf Life                        | 12 months from the date of production                                                                                                                                                |                                   |
| Transportation Conditions         | Clean transport vehicles free from foreign odors; products transported in sealed, properly secured packaging                                                                         |                                   |

This specification is developed based on internal standards and current cosmetics regulations.

\*Periodic testing conducted once a year

\*\* According to Annex III of Regulation 1223/2009/EC dated November 30, 2009, on cosmetic products.
